# Supplementary figures and images for: Preparation, characterization, and photocatalytic performance of a PVDF/cellulose membrane modified with nano Fe3O4 for removal of methylene blue using RSM under visible light
Source: Royal Society of Chemistry journal article supplement (doi:10.1039/d3ra08599f), 2024-01-01

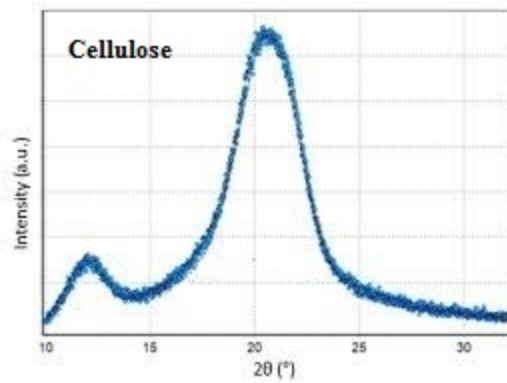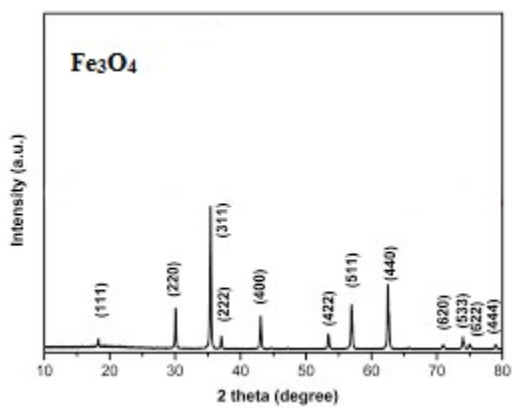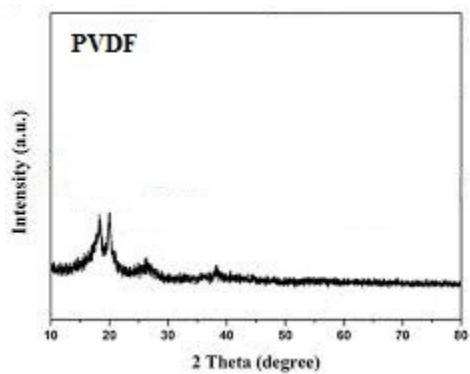

Fig. 1s. Standard XRD patterns of Cellulose, Fe<sub>3</sub>O<sub>4</sub> and PVDF

Supplement: d3ra08599f1.pdf [file d3ra08599f1.pdf]
